# Supplementary material for: Kisspeptin Protein in Seminal Plasma Is Positively Associated with Semen Quality: Results from the MARHCS Study in Chongqing, China
Source: Hindawi journal article supplement (doi:10.1155/2019/5129263), 2019-01-09
Supplement: f1 [file 5129263.f1.pdf]

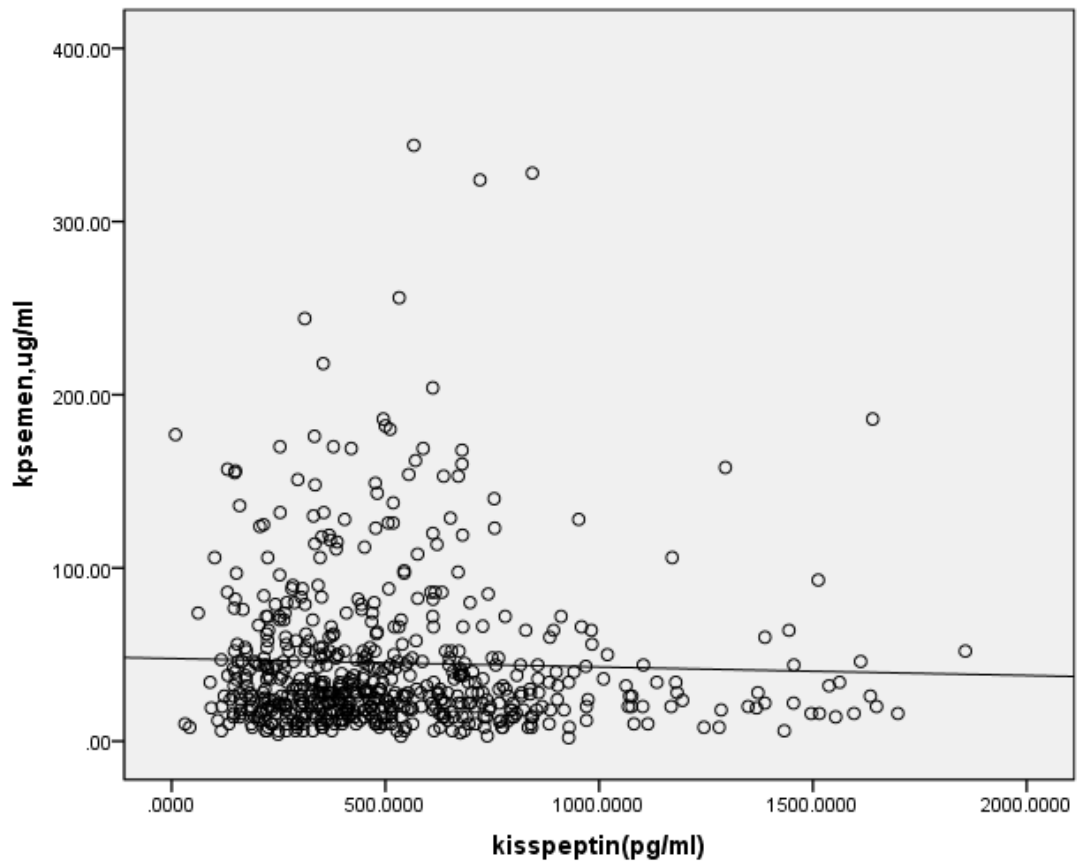

**Supplemental figure. Scatter plot of kisspeptin in semen plasma versus kisspeptin in blood plasma.** There was no statistically significant association between kisspeptin in semen plasma and kisspeptin in blood plasma.
